# Supplementary material
Source: publisher figshare collection journal article supplement (https://gsajournals.figshare.com/ndownloader/files/35373763)
Supplement: Supplementary file 1 [file 35373763]

## Sheet: Supplementary Table S5
Supplementary Table S5. Genomic information for the 126 a priori candidate genes in the tocochromanol and chlorophyll biosynthesis pathways. Causal genes that were identified by genetic mapping in this Ames panel are bolded.
RefGen_v4 gene ID	a priori candidate gene pathway	RefGen_v4 chromosome	RefGen_v4 start open reading frame (bp)	RefGen_v4 stop open reading frame (bp)	RefGen_v4 annotated gene function
Zm00001d027656	Chlorophyll degradation	1	10261506	10265855	Lethal leaf-spot 1
Zm00001d027694	Prenyl group synthesis	1	11299491	11303586	Solanesyl diphosphate synthase 2 chloroplastic
Zm00001d027950	Tetrapyrrole biosynthesis I (from glutamate)	1	18185512	18190288	Uroporphyrinogen-III synthase chloroplastic
Zm00001d028477	Chorismate/tyrosine synthesis	1	36246226	36256685	Chorismate synthase chloroplastic
Zm00001d028712	Chorismate/tyrosine synthesis	1	43999111	44006680	Arogenate dehydratase/prephenate dehydratase 2 chloroplastic
Zm00001d029074	3,8-divinyl-chlorophyllide biosynthesis I (aerobic, light-dependent)	1	57250815	57254236	Uroporphyrinogen decarboxylase 2 chloroplastic
Zm00001d029150	3,8-divinyl-chlorophyllide biosynthesis I (aerobic, light-dependent)	1	60631458	60632663	Divinyl reductase1
Zm00001d029391	Chorismate/tyrosine synthesis	1	68665582	68667909	Phospho-2-dehydro-3-deoxyheptonate aldolase 2 chloroplastic
Zm00001d030369	Chorismate/tyrosine synthesis	1	126770594	126771011	Phospho-2-dehydro-3-deoxyheptonate aldolase 2 chloroplastic
Zm00001d030549	Chlorophyll degradation	1	143230400	143232667	Red chlorophyll catabolite reductase chloroplastic
Zm00001d031071	Tocochromanol pathway	1	175969709	175971563	Albino or pale green mutant1
Zm00001d031860	Chlorophyll cycle	1	204433977	204438771	7-hydroxymethyl chlorophyll a reductase chloroplastic
Zm00001d031934	Prenyl group synthesis/chlorophyll degradation	1	207282233	207283474	Chlorophyllase-1
Zm00001d032532	Tetrapyrrole biosynthesis I (from glutamate)	1	229809577	229812869	Glutamyl-tRNA reductase 1 chloroplastic
Zm00001d032576	3,8-divinyl-chlorophyllide biosynthesis I (aerobic, light-dependent)	1	231120510	231123615	Protochlorophyllide reductase C chloroplastic (por1)
Zm00001d032926	Prenyl group synthesis/chlorophyll degradation	1	243418415	243419837	Chlorophyllase2
Zm00001d033555	Tryosine degradation	1	267028868	267032375	Fumarylacetoacetate (FAA) hydrolase family
Zm00001d033896	IPP synthesis	1	277726512	277729830	Lemon white1
Zm00001d034523	Chlorophyll degradation	1	295617955	295620748	Pheophorbide a oxygenase
Zm00001d034739	Tryosine degradation	1	301037532	301040854	Fumarylacetoacetate (FAA) hydrolase family
Zm00001d001820	3,8-divinyl-chlorophyllide biosynthesis I (aerobic, light-dependent)	2	1439871	1441447	Protochlorophyllide reductase1
Zm00001d001850	3,8-divinyl-chlorophyllide biosynthesis I (aerobic, light-dependent)	2	1914398	1919938	Magnesium-chelatase subunit ChlH chloroplastic
Zm00001d001896	Prenyl group synthesis	2	2509567	2511414	Probable phytol kinase chloroplastic (vte5)
Zm00001d002128	Chorismate/tyrosine synthesis	2	6409519	6412809	Shikimate kinase 1 chloroplastic
Zm00001d002358	3,8-divinyl-chlorophyllide biosynthesis I (aerobic, light-dependent)	2	10781211	10785395	Necrotic4
Zm00001d003214	3,8-divinyl-chlorophyllide biosynthesis I (aerobic, light-dependent)	2	36238478	36251590	Protoporphyrinogen IX oxidase2
Zm00001d003830	Chorismate/tyrosine synthesis	2	61203599	61204879	Arogenate dehydratase/prephenate dehydratase 6 chloroplastic
Zm00001d004531	Chlorophyll cycle	2	116800854	116802446	Chlorophyllide a oxygenase chloroplastic
Zm00001d005351	Chorismate/tyrosine synthesis	2	170643478	170644746	Arogenate dehydratase/prephenate dehydratase 6 chloroplastic
Zm00001d006242	Chorismate/tyrosine synthesis	2	202646606	202650071	3-dehydroquinate synthase chloroplastic
Zm00001d006387	Tocochromanol pathway	2	206364249	206367453	Homogentisate phytyltransferase 1 chloroplastic
Zm00001d006657	Tocochromanol pathway	2	213698948	213714990	Homogentisate solanesyltransferase chloroplastic
Zm00001d006678	Prenyl group synthesis	2	214097373	214099059	Geranylgeranyl pyrophosphate synthase1
Zm00001d006778	Prenyl group synthesis	2	216443683	216448352	Alpha/beta-Hydrolases superfamily protein (vte7)
Zm00001d006779	Prenyl group synthesis	2	216461133	216468803	Alpha/beta-Hydrolases superfamily protein (vte7)
Zm00001d006900	Chorismate/tyrosine synthesis	2	219013866	219017858	Phospho-2-dehydro-3-deoxyheptonate aldolase 2 chloroplastic
Zm00001d007462	Tryosine degradation	2	232247283	232255516	Tyrosine aminotransferase homolog1
Zm00001d039312	Chlorophyll cycle	3	1461989	1466446	Non-yellow coloring1
Zm00001d039491	Tocochromanol pathway	3	5766074	5768360	Homogentisate phytyltransferase 1 chloroplastic
Zm00001d040163	IPP synthesis	3	29846486	29852954	Deoxy xylulose reductoisomerase1
Zm00001d040356	Prenyl group synthesis/3,8-divinyl-chlorophyllide biosynthesis I (aerobic, light-dependent)	3	39647289	39648626	Geranylgeranyl hydrogenase2
Zm00001d040463	3,8-divinyl-chlorophyllide biosynthesis I (aerobic, light-dependent)	3	44744039	44746612	Magnesium-protoporphyrin IX monomethyl ester [oxidative] cyclase chloroplastic
Zm00001d040850	Chorismate/tyrosine synthesis	3	71571869	71601459	Shikimate biosynthesis protein aroDE
Zm00001d041700	Chorismate/tyrosine synthesis	3	133867939	133872499	Bifunctional 3-dehydroquinate dehydratase/shikimate dehydrogenase chloroplastic
Zm00001d042026	Chlorophyll cycle	3	147731588	147734168	Chlorophyllide a oxygenase chloroplastic
Zm00001d042584	IPP synthesis	3	172740091	172743103	Diphosphocytidyl methyl erythritol synthase1
Zm00001d042685	Chorismate/tyrosine synthesis	3	176827382	176830753	Glutamate-oxaloacetate transaminase4
Zm00001d043182	IPP synthesis	3	190807759	190813079	Cytidine methyl kinase1
Zm00001d043356	Chorismate/tyrosine synthesis	3	197523894	197527638	Chorismate mutase 1 chloroplastic
Zm00001d048736	Tryosine degradation	4	4607651	4610357	S-alkyl-thiohydroximate lyase SUR1
Zm00001d049046	Tocochromanol pathway	4	13840987	13856256	Protein kinase superfamily protein
Zm00001d050412	Chorismate/tyrosine synthesis	4	86684719	86687129	Chorismate mutase 2
Zm00001d051458	IPP synthesis	4	159348371	159355666	Methyl erythritol cyclodiphosphate synthase1
Zm00001d051567	Chlorophyll degradation	4	162923074	162924909	Alpha/beta-Hydrolases superfamily protein
Zm00001d052247	Chorismate/tyrosine synthesis	4	184666747	184669386	Shikimate kinase 1 chloroplastic
Zm00001d052797	Chorismate/tyrosine synthesis	4	201290250	201299726	Phospho-2-dehydro-3-deoxyheptonate aldolase 2 chloroplastic
Zm00001d053107	Tryosine degradation	4	214129873	214132827	Tyrosine aminotransferase
Zm00001d053281	Tryosine degradation	4	223892837	223896295	Nicotianamine aminotransferase1
Zm00001d053663	Tryosine degradation	4	238377007	238380691	Fumarylacetoacetase
Zm00001d053807	Tetrapyrrole biosynthesis I (from glutamate)	4	241453021	241456437	Porphobilinogen deaminase chloroplastic
Zm00001d053953	Prenyl group synthesis	4	244172415	244173660	Lil3 protein
Zm00001d013013	3,8-divinyl-chlorophyllide biosynthesis I (aerobic, light-dependent)	5	3206170	3213965	Magnesium-chelatase subunit ChlD chloroplastic
Zm00001d013618	Chorismate/tyrosine synthesis	5	15623823	15627865	Phospho-2-dehydro-3-deoxyheptonate aldolase 2 chloroplastic
Zm00001d013651	Chlorophyll cycle	5	16205069	16210643	Chlorophyll(ide) b reductase NOL chloroplastic
Zm00001d013915	Tetrapyrrole biosynthesis I (from glutamate)	5	24682234	24685218	Glutamyl-tRNA reductase 1 chloroplastic
Zm00001d013937	3,8-divinyl-chlorophyllide biosynthesis I (aerobic, light-dependent)	5	25431430	25434346	Protochlorophyllide reductase C chloroplastic (por2)
Zm00001d014715	Tetrapyrrole biosynthesis I (from glutamate)	5	60297071	60301044	Delta-aminolevulinic acid dehydratase 1 chloroplastic
Zm00001d014734	Chorismate/tyrosine synthesis	5	61099110	61100192	Arogenate dehydrogenase 1 chloroplastic (arodeH2)
Zm00001d014737	Chorismate/tyrosine synthesis	5	61117986	61119432	Arogenate dehydrogenase 1 chloroplastic (arodeH2)
Zm00001d015094	Prenyl group synthesis	5	75259001	75273721	Alkaline/neutral invertase CINV2
Zm00001d015205	Prenyl group synthesis/chlorophyll degradation	5	79250420	79253647	Pheophytinase chloroplastic
Zm00001d015356	Tryosine degradation	5	86084655	86086755	4-hydroxyphenylpyruvate dioxygenase 1 (hppd1)
Zm00001d015366	Tetrapyrrole biosynthesis I (from glutamate)	5	86475220	86478975	Porphobilinogen deaminase chloroplastic
Zm00001d015509	Chorismate/tyrosine synthesis	5	94540334	94543558	Chorismate mutase2
Zm00001d015985	Tocochromanol pathway	5	136805708	136822194	Probable tocopherol cyclase chloroplastic (vte1)
Zm00001d016441	Tryosine degradation	5	162429370	162433900	Tyrosine aminotransferase
Zm00001d017139	IPP synthesis	5	186706299	186712746	Hydroxymethylbutenyl diphosphate synthase1
Zm00001d017608	IPP synthesis	5	201460778	201462840	Methyl erythritol cyclodiphosphate synthase2
Zm00001d017746	Tocochromanol pathway	5	205825586	205829216	vitamin E synthesis 4 (vte4)
Zm00001d018034	Prenyl group synthesis/3,8-divinyl-chlorophyllide biosynthesis I (aerobic, light-dependent)	5	212543656	212546035	Geranylgeranyl hydrogenase1
Zm00001d018061	Chorismate/tyrosine synthesis	5	213495789	213498656	Shikimate kinase
Zm00001d035769	Chorismate/tyrosine synthesis	6	46863730	46864754	Chorismate mutase 2
Zm00001d036046	3,8-divinyl-chlorophyllide biosynthesis I (aerobic, light-dependent)	6	68433795	68434769	Magnesium protoporphyrin IX methyltransferase chloroplastic
Zm00001d036439	Chorismate/tyrosine synthesis	6	88560354	88561488	Arogenate dehydrogenase isoform 2
Zm00001d037858	Tocochromanol pathway	6	139991985	139995915	Protein kinase superfamily protein
Zm00001d037984	3,8-divinyl-chlorophyllide biosynthesis I (aerobic, light-dependent)	6	144381242	144390852	Chlorophyll synthase chloroplastic
Zm00001d038170	IPP synthesis	6	150418144	150422431	Deoxy xylulose synthase 1 (dxs1)
Zm00001d038193	IPP synthesis	6	151176435	151181930	Isopentenyl pyrophosphate isomerase3
Zm00001d038547	Tetrapyrrole biosynthesis I (from glutamate)	6	159734306	159738603	Glutamate-1-semialdehyde 21-aminomutase 2 chloroplastic
Zm00001d019060	IPP synthesis	7	14494700	14497925	Deoxy xylulose synthase 2 (dxs2)
Zm00001d019365	Tryosine degradation	7	29973892	29976259	Phytoene desaturation 1
Zm00001d019758	Chlorophyll degradation	7	56865812	56867212	Chlorophyllase1
Zm00001d021611	Chorismate/tyrosine synthesis	7	158049839	158052734	Arogenate dehydratase/prephenate dehydratase 2 chloroplastic
Zm00001d021709	IPP synthesis	7	160908408	160912025	Isopentenyl pyrophosphate isomerase1
Zm00001d021899	Chlorophyll degradation	7	165624232	165629431	Alpha/beta-Hydrolases superfamily protein
Zm00001d021929	Prenyl group synthesis	7	166016446	166018185	Geranylgeranyl pyrophosphate synthase2
Zm00001d022181	Chorismate/tyrosine synthesis	7	172074891	172079102	Phospho-2-dehydro-3-deoxyheptonate aldolase 1
Zm00001d022622	Chorismate/tyrosine synthesis	7	181391530	181395150	3-dehydroquinate synthase chloroplastic
Zm00001d008203	3,8-divinyl-chlorophyllide biosynthesis I (aerobic, light-dependent)	8	1019559	1026656	Protoporphyrinogen IX oxidase1
Zm00001d008230	3,8-divinyl-chlorophyllide biosynthesis I (aerobic, light-dependent)	8	2034108	2036318	Magnesium-protoporphyrin IX monomethyl ester [oxidative] cyclase chloroplastic
Zm00001d008370	Prenyl group synthesis	8	6617307	6618398	Geranylgeranyl pyrophosphate synthase3
Zm00001d008427	IPP synthesis	8	8429852	8436838	Deoxy xylulose reductoisomerase2
Zm00001d009987	Tocochromanol pathway	8	93548283	93551747	Ubiquinone biosynthesis protein ubiB
Zm00001d010190	Chorismate/tyrosine synthesis	8	103456053	103460657	Glutamate-oxaloacetate transaminase5
Zm00001d010240	Chlorophyll degradation	8	105682069	105684075	Alpha/beta-Hydrolases superfamily protein
Zm00001d010274	IPP synthesis	8	106962806	106966802	Isopentenyl pyrophosphate isomerase2
Zm00001d011387	3,8-divinyl-chlorophyllide biosynthesis I (aerobic, light-dependent)	8	149262980	149266214	Uroporphyrinogen decarboxylase 1 chloroplastic
Zm00001d011756	Prenyl group synthesis	8	160818522	160825421	Protein VTE6 chloroplastic
Zm00001d011819	Chlorophyll cycle	8	162062147	162065473	Chlorophyllide a oxygenase chloroplastic
Zm00001d012197	IPP synthesis	8	169924646	169928100	Diphosphocytidyl methyl erythritol synthase2
Zm00001d012674	Chorismate/tyrosine synthesis	8	178397389	178409967	Chorismate mutase1
Zm00001d045383	IPP synthesis	9	20241125	20246184	Deoxy xylulose synthase3
Zm00001d045450	Chorismate/tyrosine synthesis	9	22538569	22542325	Enolpyruvylshikimate phosphate synthase1
Zm00001d045610	Tryosine degradation	9	28669344	28671875	Homogentisate 12-dioxygenase
Zm00001d046168	Chorismate/tyrosine synthesis	9	68800140	68802556	Arogenate dehydrogenase 1 chloroplastic
Zm00001d046558	Tocochromanol pathway	9	95895575	95899061	Homogentisate geranylgeranyl transferase1 (hggt1)
Zm00001d046909	Tocochromanol pathway	9	110047719	110058786	Homogentisate phytyltransferase 1 chloroplastic
Zm00001d047755	Chorismate/tyrosine synthesis	9	140918274	140926061	Arogenate dehydratase/prephenate dehydratase 2 chloroplastic
Zm00001d047896	Chorismate/tyrosine synthesis	9	144617709	144628809	Chorismate synthase chloroplastic
Zm00001d048560	Chorismate/tyrosine synthesis	9	158683140	158684127	Glutathione S-transferase U16
Zm00001d023536	3,8-divinyl-chlorophyllide biosynthesis I (aerobic, light-dependent)	10	9162610	9167073	Magnesium-chelatase subunit ChlI-1 chloroplastic
Zm00001d023892	Chorismate/tyrosine synthesis	10	26542390	26547193	Shikimate dehydrogenase1
Zm00001d023968	Tryosine degradation	10	32563929	32567309	Glutathione S-transferase
Zm00001d025333	Chorismate/tyrosine synthesis	10	114461652	114462911	Arogenate dehydratase/prephenate dehydratase 6 chloroplastic
Zm00001d026405	Tetrapyrrole biosynthesis I (from glutamate)	10	145315798	145319169	Glutamyl-tRNA reductase
Zm00001d026603	3,8-divinyl-chlorophyllide biosynthesis I (aerobic, light-dependent)	10	148758023	148764012	Magnesium-chelatase subunit ChlH chloroplastic
